# Supplementary material for: Isotope hydrological studies of the perennial ice deposit of Saarhalle, Mammuthöhle, Dachstein Mts, Austria
Source: Copernicus journal article supplement (doi:10.5194/tc-5-291-2011), 2011-03-29
Supplement: Supplementary file 1 [file KrippensteinVsFeuerkogel_Supplement.pdf › KrippensteinVsFeuerkogel_Supplement.pdf]

Linear regression between monthly stable oxygen isotope composition measured in atmospheric precipitation between July 1991 and October 1994 at Krippenstein and Feuerkogel.

Data sources for Krippenstein : Schleidleder et al. 2001

For Feuerkogel: ANIP 2010

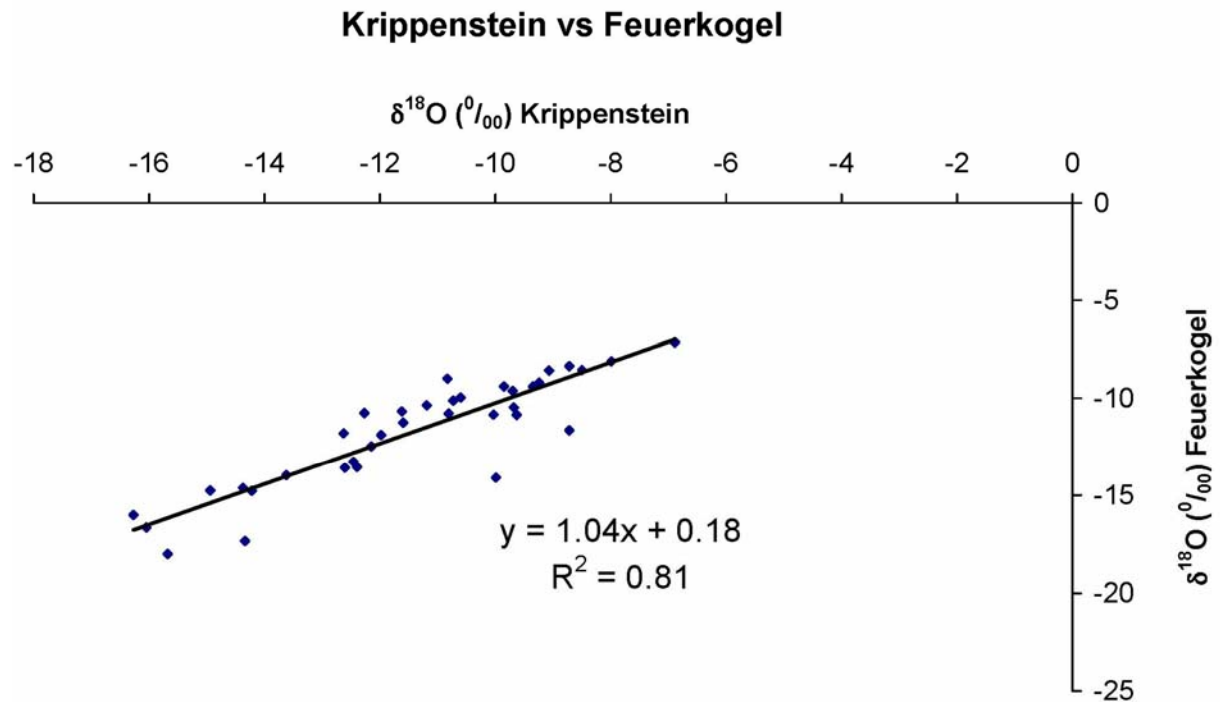

#### References:

ANIP: Austrian Network of Isotopes in Precipitation, Umweltbundesamt: <http://www.umweltbundesamt.at/umweltinformation/wasser/isotopen/isotopen>, 2010. last access: 27 October 2010

Scheidleder, A., Boroviczeny, F., Graf, W., Hofmann, T., Mandl, G., Schubert, G., Stichler, W., Trimborn, P., and Kralik, M.: Pilotprojekt „Karstwasser Dachstein“: Bd. 2 Karsthydrologie und Kontaminationsrisiko von Quellen. Umweltbundesamt Monographie 108 / Archiv f. Lagstättenforschung 21, Geologische Bundesanst., 155 S., Wien., 2001
